# Supplementary material for: Mapping and Genetic Structure Analysis of the Anthracnose Resistance Locus Co-1HY in the Common Bean (Phaseolus vulgaris L.)
Source: PubMed Central journal article supplement (PMC5226810; doi:10.1371/journal.pone.0169954), 2017-01-11

**Phvul.001G243500**

Hong\_Yundou : ATTTGCCAATTAGAACACTGAAACTATATATCTATGGAAATATGTATGTTGAAAGCTTTCATT : 63  
Jingdou : ATTTGCCAATTAGAACACTGAAACTATATATCTATGGAAATATGTATGTTGAAAGCTTTCATT : 63

Hong\_Yundou : TTCTGCATTATCCCCAGCTACAGGCAAGTTGAAAAGTGAAACACACCAAAGCTTTCATTT : 126  
Jingdou : TTCTGCATTATCCCCAGCTACAGGCAAGTTGAAAAGTGAAACACACCAAAGCTTTCATTT : 126

Hong\_Yundou : TCTGCATTATCCCCAGCCACAGGCAAGTTGAAAAGTGAAAAACACCAAAGCTTCAAACGT : 189  
Jingdou : TCTGCATTATCCCCAGCCACAGGCAAGTTGAAAAGTGAAAAACACCAAAGCTTCAAACGT : 189

Hong\_Yundou : AGTTAACAAACCATTCAACAAAGGCAGGAAGACACAACCTCTCTTGAATCATACGATAAGCAAA : 252  
Jingdou : AGTTAACAAACCATTCAACAAAGGCAGGAAGACACAACCTCTCTTGAATCATACGATAAGCAAA : 252

Hong\_Yundou : GATATAAAGGACAAAAATGGGTATTTCACTAAAATAGTCCCTGGTCCTTTCAAAGATGTTCCACA : 315  
Jingdou : GATATAAAGGACAAAAATGGGTATTTCACTAAAATAGTCCCTGGTCCTTTCAAAGATGTTCCACA : 315

Hong\_Yundou : TATTGATGGGGATTTTAATCAAAGACTAAAACATATGGGGATTTAAATAATATACCATTGGAA : 378  
Jingdou : TATTGATGGGGATTTTAATCAAAGACTAAAACATATGGGGATTTAAATAATATACCATTGGAA : 378

Hong\_Yundou : ATTTATTATTACATTAATATAAAACAAAATTAGTATAAAGTTTTGTAAATATCTATCATAATA : 441  
Jingdou : ATTTATTATTACATTAATATAAAACAAAATTAGTATAAAGTTTTGTAAATATCTATCATAATA : 441

Hong\_Yundou : TGATGCAATATATTATAATATGATGCAATATATTTTAAAAATGTATTATTAAGTCAATAGTCA : 504  
Jingdou : TGATGCAATATATTATAATATGATGCAATATATTTTAAAAATGTATTATTAAGTCAATAGTCA : 504

Hong\_Yundou : AATCAATATATTATAATTTAGGATTTATTTATAGAAAATTTTTTCATTGGTATAATAGGTTTT : 567  
Jingdou : AATCAATATATTATAATTTAGGATTTATTTATAGAAAATTTTTTCATTGGTATAATAGGTTTT : 567

Hong\_Yundou : CATCTAGTCTTTTTCATCTAGTCTGTTCTAAGAATTTTTTATTAATAGGTATAGTCTACATAT : 630  
Jingdou : CATCTAGTCTTTTTCATCTAGTCTGTTCTAAGAATTTTTTATTAATAGGTATAGTCTACATAT : 630

Hong\_Yundou : GTATCGTTTTTGTTAACATATGAGTTTTAGTCTAGTCTTTATATTTTTTATTTTTTTAATAAT : 693  
Jingdou : GTATCGTTTTTGTTAACATATGAGTTTTAGTCTAGTCTCTATATTTTTTATTTTTTTAATAAT : 693

Hong\_Yundou : ACTTCTTTTATGTGATGACAAATGATTGTTGTTACTTGAGTTGTCAGCCTAGTTGAGATGTCA : 756  
Jingdou : ACTTCTTTTATGTGATGACAAATGATTGTTGTTACTTGAGTTGTCAGCCTAGTTGAGATGTCA : 756

Hong\_Yundou : AGTAGCATAGTGATGCTAACATGAAAGTTTTTTTATAAAAAAAAAAATTAATAAAAAAAAAAGTTAA : 819  
Jingdou : AGTAGCATAGTGATGCTAACATGAAAGTTTTTTTATAAAAAAAAAAATTAATAAAAAAAAAAGTTAA : 819

Hong\_Yundou : TATATTATAATATTATGATCTTTATAAAAAAAAAAGTCAATATATTATAATATTATG : 875  
Jingdou : TATATTATAATATTATGATCTTTATAAAAAAAAAAGTCAATATATTATAATATTATG : 875

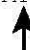

**Phvul.001G24360**

Hong\_Yundou : TACTAGTCAAATGGAGATTTTACATAGTTTATAGAGTATAAATCTCATTTTTGTGAGATTG : 63  
Jingdou : TACTAGTCAAATGGAGATTTTACATAGTTTATAGAGTATAAATCTCATTTTTGTGAGATTG : 63

Hong\_Yundou : AATAAAATGATGGAATTAAAAATATAGTTAAGTTTTGGGTTGTGTGCTACGTAGCGATAAGA : 126  
Jingdou : AATAAAATGATGGTATTAAAAAATAGTTAAGTTTTGGGTTGTGTGCTACGTAGCGATAAGA : 126

Hong\_Yundou : ATGGTCCCTCATGTAATATTTGATCTTGCAAGGATTTTATGGGTATCTTTGAAGTATGAAT : 189  
Jingdou : ATGGTCCCTCATGTAATATTTGATCTTGCAAGGATTTTATGGATATCTTTGAAGTATGAAT : 189

Hong\_Yundou : TGAATGTTTCACTGTATACGGTACGCGTCAATGAGTGAGGTTGAGTTTCTCTTTTCCTTGCA : 252  
Jingdou : TGAATGTTTCACTGTATACGCTACGCGTCAATGAGTGAGGTTGAGTTTCTCTTTTCCTTGCA : 252

Hong\_Yundou : GCTTCTCAACTAGTACGCGTTAGATCCCTGCAACTGTGTATATAAGTGTCTTTAACATAGAT : 315  
Jingdou : GCTTCTCAACTAGTACGCGTTAGATCCCTGCAACTGTGTATATAAGTGTCTTTAACATAGAT : 315

Hong\_Yundou : TCATTCAATTTAGCTGATGCAGAGTGAAATTTAGCAGAATTGAGATGGCTAATAACGCAGTTGA : 378  
Jingdou : TCATTCAATTTAGCTGATGCAGAGTGAAATTTAGCAGAATTGAGATGGCTAATAACGCAGTTGA : 378

Hong\_Yundou : TG : 380  
Jingdou : TG : 380

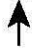

**Phvul.001G243700**

Hong\_Yundou : CCCCACCATTACTAACTACACTTCCATTCTACAAAAACACTAAAAAAATACTTTTTTTT-CTT : 62  
Jingdou : CCCCACCATTACTAACTACACTTCCATTCTACAAAAACACTAAAAAAATACTTTTTTTTCTT : 63

Hong\_Yundou : CCGCACCACACCAATTTAGTTGCCGCCACACTAAAAAACTAAATATATTATTATTGTTATT : 125  
Jingdou : CCTGCACCACACCAATTTAGTTGCCGCCACACTAAAAAACTAAATATATTATTATTGTTATT : 126

Hong\_Yundou : ATTTTATTTATGTAAGATCTTATAATCAATTTGATAAAAAAATTACATTAAAAATTATTAAT : 188  
Jingdou : ATTTTATTTATGTAAGATCTTATAATCAATTTGATAAAAAAATTACATTAAAAATTATTAAT : 189

Hong\_Yundou : ATCAACTAATTTAAGGATAAAAA-CTACAAATTTATTATATTAATTGAGTTATATATTATATTA : 250  
Jingdou : ATCAACTAATTTAAGGATAAAAACTACAAATTTATTATATTAATTAAGTTATATATTATATTA : 252

Hong\_Yundou : TCAATCAAAATTTAAAAATAAAATATTATTAATTATTATATTAACTAAGTTATATACTACATT : 313  
Jingdou : TCAATCAAAATTTAAAAATAAAATATTATTAATTATTATATTAACTAAGTTATATACTATATT : 315

Hong\_Yundou : RTAAATCAAGATATTAGTATTTAAAGTAGGCTTAATTAGAATCTAAATAGATAGTAACTAAAC : 376  
Jingdou : ATAAATCRAGATATTAGTATTTAAAGTAGGCTTAATTAGAATCTAAATAGATAGTAACTAAAC : 378

Hong\_Yundou : CTACTTTAATAGTTTATGACAAATATCGATTTAATTTTTTTTATTAATAATATAAATTAATTT : 439  
Jingdou : CTACTTTAATAGTTTATGACAAATATCAATTTAATTTTTTTTATTAATAATATAAATTAATTT : 441

Hong\_Yundou : AGATAATAATAACTTTTTAATTTATAAAATTTATTTAACTTAATTAATATAATGAATAATTAA : 502  
Jingdou : AGATAATAATAACTTTTTAATTTATAAAATTTATTTAACTTAATTAATATAATGAATAATTAT : 504

Hong\_Yundou : TTTT--ATCTTTAAATTAATTGATATTTATTAATTTGTTTATAGTATACATATATAACTAT : 563  
Jingdou : TTTTTTTATCTTTAAATTAATTGATATTTATTAATTTGTTTATAGTATGCATATATAAT--- : 564

Hong\_Yundou : ATATAAAGTGTGAAATGTAATAAAGTTGAACATATACCAATTAAAATAAAATATTTGAATTAC : 626  
Jingdou : -----AATAT-----AT : 572

Hong\_Yundou : AACTATATACCTTTGTAATCTTTTTAACTTGTTAATGTAGCTAACTATATATAAATTAATG : 689  
Jingdou : AGTTATATACCTTTGTAATCTTTTTAACTTGTTAATGTAACTAACTATATATAAATTAATG : 635

Hong\_Yundou : T---TTTTTTTTAAGTTTTAGTTAAATTCTCAAAATAAATTTTGTATGGCAATAATAT----- : 744  
Jingdou : TATTTTTTTTTAAGTTTTAGTTAAATTCTCAAAATAAATTTTGTATGGCAATAATATAATAT : 698

Hong\_Yundou : GTTAGCTTTAGTTTGAAGTGACTTATGAAGAAGAAAGTGGTGAAGGTTACCC---TTCTCTT : 804  
Jingdou : GTTAGCTTTAGTTTGAAGTGACTTATRAAGAGGAAAGTGGTGAAGGTTACCCCCCTTCTCTT : 761

Hong\_Yundou : GCCTCGCACCTTCTTAAAGTGAGTGTTCAGAAAAATAGGAGAAAAACGATGGAGCTTTGCA : 867  
Jingdou : GCCTCGCACCTTCTTAAAGTGAGTGTTCAGAGAAATAGGAGAAAAACGATGGAGCTTTGCA : 824

Hong\_Yundou : CTCTCTTTGTTTCCATTGTT----- : 887  
Jingdou : CTCTCTTTGTTTCCATTGTTTTATGTGGATGAAGAGGGATTTAAGAAAACAGTCAACCAC : 887

Hong\_Yundou : ----- : -  
Jingdou : AATGAAAGAATAAAAAAAGTGTGGATTTGAAGGATTGTAATTGAATAATCGATTATAAAA : 950

Hong\_Yundou : -----ACTATGCTTAAAAATAAATTACACGTGTGTAAATATAAATATATAAAT : 937  
Jingdou : ATATATATAATTTACTATGCTTAAAAATAAATTGCACGTGTGTAAATATAAATATA-ATAAT : 1012

Hong\_Yundou : AAAAAA-----TAAATTTATAATTAAACAAT-ATGAAAAAATATTAAAATG : 982  
Jingdou : AAAAAAATTGTAATTAAACAATATGAAAAAATATTAAAATAATTATGARAAAATATTAAAATG : 1075

Hong\_Yundou : ATTAGGAAAAAATATTGAAATTATAGTATTCGGGGGGTTGTAATGTATATAAAAAATTCTAAAA : 1045  
Jingdou : ATTAGGAAAAAATATTGAAATAATAGTATTCGGGGG-TTGTAATGTATATAAAAAATTCTAA-- : 1135

Hong\_Yundou : GTTATGATTAATGGGAATGGCTCTGAAGCACTTTGGCAGAAAAACGAGAATGTATTGCTTTTC : 1108  
Jingdou : GTTATGATTAATGGGAATGGCTCTGAAGCACTTTGGCAGAAAAACGATAATGCATTGCTTTTC : 1198

Hong\_Yundou : TTCAGTTACAAATGCAATGGCAGTGTCTTTTTATAGTCAAATCAYCCACCGCCTATTTTCAA : 1171  
Jingdou : TTCAGTTACAAATGCAATGGCAGTGTCTTTTTATAGTCAAATCATCCACCGCCTATTTTCAA : 1261

Hong\_Yundou : AGTCGGTATTTTTAAGATAATTTGTACCTGTCTTGGACTTTTCACTCATTGTGTTTTCGGGGA : 1234  
Jingdou : AGTCGGTATTCTAAAGATAATTTGTACCTATCTTGGACTTTTCACTCATTGTGTTTTCGGGGA : 1324

Hong\_Yundou : AATCATGCATACACATGCACCTGTTGTTCTTTTCTTAGTACTTTCTTCTAAAAATTTGTAGCA : 1297  
Jingdou : AATCATGCATACATATGCACCTTTGTTCTTTTCTTAGTACTTTCTTCTACAAATTTGTAGCA : 1387

Hong\_Yundou : ACTGTATATATATGTGTGTCCAAAGCGAGCATGCAGTAGATTACAAAGCAAACATTTGGAT : 1360  
Jingdou : ACTATATGTATATATATGTGTCCAAAGCGAGCATGCAGTAGATTACAAAGCAAACATTTGGAT : 1450

Hong\_Yundou : TCGCTACACACATAGTTTACAGTTGAGGCAAGTGGGAAAACAAAA-----GATTGAAC : 1415  
Jingdou : TCGCTACACACATAGTTTACAGTTGAGGCAAGTGGGAAAACAAAAACACATTGAGATTGAAC : 1513

Hong\_Yundou : TTTCAAGCATATATG : 1430  
Jingdou : TTTCAAGCATATATG : 1528

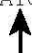

**Phvul.001G243800**

Hong\_Yundou : TTTC**CCAAT**CTGGAACATCTTTTTTTAAATTATTCCTATACGTATAGAAAAAAAAATATTCATT : 63  
Jingdou : TTTC**CCAAT**CTGGAACATCTTTTTTTAAATTATTCCTATACGTATAGAAAAAAAAATATTCATT : 63

Hong\_Yundou : TACACGGCACATAAAATAAACCCCATTTA**CCAAT**ATTTTTAAAGAGGATT**CAGTTGAAAATAA** : 126  
Jingdou : TACACGGCACATAAAATAAACCCCATTTA**CCAAT**ATTTTTAAAGAGGATT**CAGTTGAAAATAA** : 126

Hong\_Yundou : **TAAAGT**GAAAAATAAAAAATAAAAGTTCT**TAATAT**GCGTAATGAAACACGTGCAAAGATTATAT : 189  
Jingdou : **TAAAGT**GAAAAATAAAAAATAAAAGTTCT**TAATAT**GCGTAATGAAACACGTGCAAAGATTATAT : 189

Hong\_Yundou : ATTCATTTTAAGCATTGATTTTGTTTTAAAAAATGAAAAATAAGTAGGATTAGTGTG**TCTGTT** : 252  
Jingdou : ATTCATTTTAAGCATTGATTTTGTTTTAAAAAATGAAAAATAAGTAGGATTAGTGTG**TCTGTT** : 252

Hong\_Yundou : TACTACTATAATCAGCTTTAGCACTAAATTTGAGCCCTTAAGTGTACTTATTTGACTCCTCCT : 315  
Jingdou : TACTACTATAATCAGCTTTAGCACTAAATTTGAGCCCTTAAGTGTACTTATTTGACTCCTCCT : 315

Hong\_Yundou : CATCAAGATTTGGTCTTCAACCC**CAAT**TTTAAGTTGCCCACTGGGAAAGTACCCACCT**CTAAT** : 378  
Jingdou : CATCAAGATTTGGTCTTCAACCC**CAAT**TTTAAGTTGCCCACTGGGAAAGTACCCACCT**CTAAT** : 378

Hong\_Yundou : **TTTCTTCC**TACTTTTTTTTTTATAATTAAATGTGAAATAAACATATA**ATAATAGATATTATT** : 441  
Jingdou : **TTTCTTCC**TACTTTTTTTTTT-ATAATTAAATGTGAAATAAACATATA**ATAATAGATATTATT** : 440

Hong\_Yundou : TGTCTAAAGAGAAGGTCTAACAAAATCATT**TAATAT**TGTTCTCTTTTAAATTAACATGGTTGT : 504  
Jingdou : TGTCTAAAGAGAAGGTCTAACAAAATCATT**TAATAT**TGTTCTCTTTTAAATTAACATGGTTGT : 503

Hong\_Yundou : TCTATTTTTAGTTTCTATTCACCTGTATTAGTTATATTTTCATTAAATTTTTTATTCGTATTAAA : 567  
Jingdou : TCTATTTTTAGTTTCTATTCACCTGTATTAGTTATATTTTCATTAAATTTTTTATTCGTATTAAA : 566

Hong\_Yundou : GAC**CAAT**TTAGATGTCTT**AAATACAT**CATGAGAATTTACCTATTAATTAGGTTTGATTATTAGTT : 630  
Jingdou : GAC**CAAT**TTAGATGTCTT**AAATACAT**CATGAGAATTTACCTATTAATTAGGTTTGATTATTAGTT : 629

Hong\_Yundou : GGATTTTACCTTAAATCAATCCCAACATATCAAT**AAATA**CTAATGAATCATTCC**TAAATCCAT** : 693  
Jingdou : GGATTTTACCTTAAATCAATCCCAACATATCAAT**AAATA**CTAATGAATCATTCC**TAAATCCAT** : 692

Hong\_Yundou : AGAACCTGCTCATGATGTCACACTATTTAGTTTCATCTTTATGATATAAAAAAAAAATTA**AATT** : 756  
Jingdou : AGAACCTGCTCATGATGTCACACTATTTAGTTTCATCTTTATGATATAAAAAAAAAATTA**AATT** : 755

Hong\_Yundou : GATTGAATAAAAAAAAA**AAAAATATATATATAT**-CTAATTTTTTTAAATTAAG**ATATATAT** : 817  
Jingdou : GATTGAATAAAAAAAAA**ATATATATATATATATAT**CTAATTTTTTTAAATTAAG**ATATATAT** : 818

Hong\_Yundou : **ATATATAAT**TATTTTTTATAAAATTTATT**TAATAAATAAT**CAAGCTTTTGATATATTATTAT : 880  
Jingdou : **ATA---**ATTTTTTTATAAAATTTATT**TAATAAATAAT**CAAGCTTTTGATATATTATTAT : 877

Hong\_Yundou : TGGATTAAACGAAAATGAAAACAAAATTTATATTTATTAAATATTAATCATGAATAAATAT : 943  
 Jingdou : TGGATTAAACGAAAATGAAAACAAAATTTATATTTATTAAATATTAATCATGAATAAATAT : 940

Hong\_Yundou : AAATTTTTAGGTTATGAACGAAGATAATTATAGTAGAACTGGTATCTGCGACCAAACAGTGCA : 1006  
 Jingdou : AAATTTTTAGGTTATGAACGAAGATAATTATAGTAGAACTGGTATCTGCGACCAAACAGTGCA : 1003

Hong\_Yundou : AAGAATTGGTCGTTTGGT**TTGACCGTCAT**TGTGAGTCTGGGT**CACCC**TTTTGAATCATTGCTA : 1069  
 Jingdou : AAGAATTGGTCGTTTGGT**TTGACCGTCAT**TGTGAGTCTGGGT**CACCC**TTTTGAATCATTGCTA : 1066

Hong\_Yundou : TCGGTTTAGAAGATTCACCTTAATTCTAATTAATTATCGATAGCTTAAAACAGGACATTAAT : 1132  
 Jingdou : TCGGTTTAGAAGATTCACCTTAATTCTAATTAATTATCGATAGCTTAAAACAGGACATTAAT : 1129

Hong\_Yundou : TAAATAATTGAGTTCAGGTAC**CAAA**TTGAAAAT**CCAA**TTACAACATAGGATTTAAAATTA : 1195  
 Jingdou : TAAATAATTGAGTTCAGGTAC**CAAA**TTGAAAAT**CCAA**TTACAACATAGGATTTAAAATTA : 1192

Hong\_Yundou : AATTAAATAAATACCCGAGC**CTTTCTTACG**TTTTATGATTACGGTCAAACCTCGATTATTA : 1258  
 Jingdou : AATTAAATAAATACCCGAGC**CTTTACTTACG**TTTTATGATTACGGTCAAACCTCGATTATTA : 1255

Hong\_Yundou : TTAAACCCATCTCTTCCACGCTGCTTCGTCCCATCAGAGACACGTGGACCTTCTCCTACTAAA : 1321  
 Jingdou : TTAAACCCATCTCTTCCACGCTGCTTCGTCCCATCAGAGACACGTGGACCTTCTCCTACTAAA : 1318

Hong\_Yundou : TAT**TAAT**ATTAATTTAACACCATAAATTCACGACTTCAAAAAATACTTTAATCT**TAAT**ACG : 1384  
 Jingdou : TAT**TAAT**ATTAATTTAACACCATAAATTCACGACTTCAAAAAATACTTTAATCT**TAAT**ACG : 1381

Hong\_Yundou : ATGTAACACATTATATTTTTTTAAAATTA----- : 1413  
 Jingdou : ATGTAACACATTATATTTTTTTAAAATTATCAAAGTTTAAATAAAATCATAACTCAAAGTG : 1444

Hong\_Yundou : -----CGAAGTGAACTTAAGCCTAACTCAATCCATAAAACCGGCTCAT : 1458  
 Jingdou : TTAAAAATATGTGTATTACGAAGTGAACTTAAGCCTAACTCAATCCATAAAACCGGCTCAT : 1507

Hong\_Yundou : GAGGGTGAGGTTTGCATCCACTTATATACTATGAAAGATTCTAATCTCTAGTCGATGTGAGAT : 1521  
 Jingdou : GAGGGTGAGGTTTGCATCCACTTATATACTATGAAAGATTCTAATCTCTAGTCGATGTGAGAT : 1570

Hong\_Yundou : CTCCAACACACCTCTCACGCCGATGCTA**CCAAT**ACGTGCATGAATATATATGTTATAGATGGT : 1584  
 Jingdou : CTCCAACACACTTCTCACGCCGATGCTA**CCAAT**ACGTGCATGAATATATATGTTATAGATGGT : 1633

Hong\_Yundou : **CCAAT**AACGGT**CCAAT**AGCGGGTGACATGATAAATGCA**CAAA**ATTTCGTTAGGATAGGCTCA : 1647  
 Jingdou : **CCAAT**AACGGT**CCAAT**AGCGGGTGACATGATAAATGCA**CAAA**ATTTCGTTAGGATAGGCTCA : 1696

Hong\_Yundou : AAATGACTCTGATACCATGTTATGAAATGAACTTTAAGCCTAACTCAATCTCATAAAACCGGT : 1710  
 Jingdou : AAATGACTCTGATACCATGTTATGAAAGTGAACCTTTAAGCCTAACTCAATCTCATAAAACCGGT : 1759

Hong\_Yundou : TCATGAGGTTGAGGTTTGCACCTCACTTATATACAATGAAGATTTTCTAATCTCTAGTCAACGT : 1773  
Jingdou : TCATGAGGTTGAGGTTTGCACCTCACTTATATACAATGAAGATTTTCTAATCTCTAGTCAACGT : 1822

Hong\_Yundou : AGGATCTCCAACAATATGAAATAATAACAAGTTAAAATAAATAAAAAATTTGATG : 1830  
Jingdou : AGGATCTCCAACAATATGAAATAATAACAAGTTAAAATAAATAAAAAATTTGATG : 1879

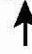

Supplement: pone.0169954.s006.pdf [file pone.0169954.s006.pdf]
