# Supplementary material for: Mapping and Genetic Structure Analysis of the Anthracnose Resistance Locus Co-1HY in the Common Bean (Phaseolus vulgaris L.)
Source: PubMed Central journal article supplement (PMC5226810; doi:10.1371/journal.pone.0169954), 2017-01-11
Supplement: pone.0169954.s004.pdf [file pone.0169954.s004.pdf]

**PHVUL.001G243500**

Hong\_Yundou : MDSESVESIEMWNYGSFDFAFSFLAVDNEIRSGTSSNLGASSPLHSFASLLDIAIR : 56  
Jingdou : MDSESVESIEMWNYGSFDFAFSFLAVDNEIRSGTSSNLGASSPLHSFASLLDIAIR : 56

Hong\_Yundou : SRTSSNWETSSANSYAFGLDNAIRSRTSSNLETSSAYSFAFGVDTAIRSRTSSNWE : 112  
Jingdou : SRTSSNWETSSANSYAFGLDNAIRSRTSSNLETSSAYSFAFGVDTAIRSRTSSNWE : 112

Hong\_Yundou : TSSTHSFAFEEDRTPSNLGSFRVPSFSSGVDYVIRSSSGGTDSETSPVHSFAFAAG : 168  
Jingdou : TSSTHSFAFEEDRTPSNLGSFRVPSFSSGVDYVIRSSSGGTDSETSPVHSFAFAAG : 168

Hong\_Yundou : ASQMAANVTGHVAKGLQLFSREELVAATNNFSLHNKIGVGSFGVVYGGLLVGREGV : 224  
Jingdou : ASQMAANVTGHVAKGLQLFSREELVAATNNFSLHNKIGVGSFGVVYGGLLVGREGV : 224

Hong\_Yundou : AIKRNETSPKMKEFQEIFVFGYLVTFGLRLHHEQLVGLVGFCEEEDEKLLVYEYMKN : 280  
Jingdou : AIKRNETSPKMKEFQEIFVFGYLVTFGLRLHHEQLVGLVGFCEEEDEKLLVYEYMKN : 280

Hong\_Yundou : GSLYDHLHHKGSVELNSWKMRIKIALDASRGIKYLHYYAGTNIYRDIKSSNILLDD : 336  
Jingdou : GSLYDHLHHKGSVELNSWKMRIKIALDASRGIKYLHYYAGTNIYRDIKSSNILLDD : 336

Hong\_Yundou : TWTARVSDFGLSSLMKAVGTIIDPEYYQYVMTAKSEVYAFGVVLELLTGKRHIL : 392  
Jingdou : TWTARVSDFGLSSLMKAVGTIIDPEYYQYVMTAKSEVYAFGVVLELLTGKRHIL : 392

Hong\_Yundou : CGEDGGTPLSVVEFAVPPILDGDLAKILDPRVGAPHVNEAKAVELMAFTAIHCVNL : 448  
Jingdou : CGEDGGTPLSVVEFAVPPILDGDLAKILDPRVGAPHVNEAKAVELMAFTAIHCVNL : 448

Hong\_Yundou : EGKDRPSLAEIVVNLKRALAIICDSSTHDSISNHTIFDVSE : 489  
Jingdou : EGKDRPSLAEIVVNLKRALAIICDSSTHDSISNHTIFDVSE : 489

**PHVUL.001G243600**

Hong\_Yundo : MANNVAVDARFSWAVDSAIASESASNLGESRVHSFASVVDGAI RSSTASEADLEAFPTH : 59  
Jingdou : MANSVAVDARFSWAVDSAIASESASNLGESRVHSFASVVDGAI RSSTASEADLEAFPTH : 59

Hong\_Yundo : YFAFASAWDKRTVAARLFTLAE LKAATNNFSIHNKIFCAGSISVVHRGK LFDGRQVAVK : 118  
Jingdou : YFAFASAWDKRTVAARLFTLAE LKAATNNFSIHNKIFCAGSISVVHRGK LFDGRQVAVK : 118

Hong\_Yundo : RAEISSKMKEFQERFGYLWTL LRLHKKHLVGLVGFCKDKRLLVY EYTKNRALYDYL : 177  
Jingdou : RAEISSKMKEFQERFGYLWTL LRLHKKHLVGLVGFCKDKRLLVY EYTKNRALYDHL : 177

Hong\_Yundo : HDKNNVDRESSALNSWRMRIK VALDASRGIEYLHKHVPSIIHRDINS SNILLDATWTA : 236  
Jingdou : HDKNNVDRESSALNSWRMRIK VALDASRGIEYLHKHVPSIIHRDINS SNILLDATWTA : 236

Hong\_Yundo : RVSGFESSCFMSPEAEHVYSD TRVLTAKSDVYGLGVVLELLTGK KTTLKFGINRETSM : 295  
Jingdou : RVSGFESSCFMSPEAEHVYSD TRVLTAKSDVYGLGVVLELLTGK KTTLKFGINRETSM : 295

Hong\_Yundo : VKIAGRVI LGWKMVKILDPRV GAPHVNEEAELEIVAHTAVSCVNS KRKDRPTMTQVVA : 354  
Jingdou : VKIAGRVI LGWKMVKILDPRV GAPHVNEEAELEIVAHTAVSCIN SKRKDRPTMTQVVA : 354

Hong\_Yundo : NLETALALCDSRPS : 368  
Jingdou : NLETALALCDSRPS : 368

**PHVUL.001G243700**

Hong\_Yundou : MANS GASLVHSFASIVEYAIRSIGGDLGAFPLRDFSF AVENAWSSIGGDLGAVPVR : 56  
Jingdou : MANS GASLVHSFASIVEYAIRSIGGDLGAFPLRDFSF AVENAWSSIGGDLGAVPCR : 56

Hong\_Yundou : GFASIVENMMRSVGGDLRALPVHGFASAVENAMISIGGDLGVSPMQGFASRVENAM : 112  
Jingdou : GFASIVENMMRSVGGDLRALPVHGFASAVENAMISIGGDLGVSPMQGFASRVENAM : 112

Hong\_Yundou : SSIGGDLGTS HSPVHGFQVFTLLELAAATNNFSVDNKIRAGSSSVVYRGKLVGDSE : 168  
Jingdou : SSIGGDLGTS HSPVHGFQVFTLLELAAATNNFSVDNKIRAGSSSVVYRGKLVGDSE : 168

Hong\_Yundou : VTIERVERWSSRTVEEAFWRRRTSSLKLPGLRPKNLVGLVGLCEEKNERVLVYEG : 224  
Jingdou : VTIERVERWSSRTVEEAFWRRRTSSLKLPGLRPKNLVGLVGLCEEKNERVLVYEG : 224

Hong\_Yundou : MKNGSLYDHLHEKGSSVLNSWKMRKIALDASRGIEYLHKFGVPSPVHGDINPSNI : 280  
Jingdou : MKNGSLYDHLHEKGSSVLNSWKMRKIALDASRGIEYLHKYGVPSPVHGDINPSNI : 280

Hong\_Yundou : LLDATWTAKVS NIGKAAGTFGYIDPEYIDLNVLTTKSDVYGFGLVLELLTGKNGG : 336  
Jingdou : LLDATWTAKVS NIGKAAGTFGYIDPEYIDLNVLTTKSDVYGFGLVLELLTGKNGG : 336

Hong\_Yundou : TILHVPSAEVSI LGGDFVKNLDKRVGEPRLNEAKALKLVAHTAINCVNVEGKVRPT : 392  
Jingdou : TILHVPSAEVSI LGGDFVKNLDKRVGEPRLNEAKALKLVAHTAINCVNVEGKVRPT : 392

Hong\_Yundou : SAQVVLNLERAFAYFRY : 410  
Jingdou : SAQVVLNLERAIAYFR-Y : 409

PHVUL.001G243800

Hong\_Yundou : MKTLTSSSVTLCLVVAALLILSLPRSSHGLGSGATLTISDASSTVCAVVARESTRRIE : 58  
Jingdou : MKTLTSSSVTLCLVVAALLILSLPRSSHGLGSGATLTISDASSTVCAVVARESTRRIE : 58

Hong\_Yundou : CYRQGQIASITPNASFSTISGGRNYFCGLRSSNSDLLCWNTSSSFERRRLYNDSVPL : 116  
Jingdou : CYRQGQIASITPNASFSTISGGRNYFCGLRSSNSDLLCWNTSSSFERRRLYNDSVPL : 116

Hong\_Yundou : ENLAVGDTHLCATEVGDGAVKWCWRTGDTFQLPSATDKFASISSGTGFSCGILKNSYRV : 174  
Jingdou : ENLAVGDTHLCATEVGDGAVKWCWRTGDTFQLPSATDKFASISSGTGFSCGILKNSRV : 174

Hong\_Yundou : RCWGDTSVSDLTERIESVFGNMSMLS LVAGGSHVCGLNSTGFLVCGGNNDGQRDFPQ : 232  
Jingdou : RCWGDTSVSDLTERIESVFGNMSMLS LVAGGSHVCGLNSTGFLVCGGNNDGQRDFPQ : 232

Hong\_Yundou : GGAFEYSGLALGAEHGCAIRGLNGSVVCWGGNGSFSVNNVTEGVSFEVIVSGSNFVCG : 290  
Jingdou : GGAFEYSGLALGAEHGCAIRGLNGSVVCWGGNGSFSVNNVTEGVSFEVIVSGSNFVCG : 290

Hong\_Yundou : LTTNNLKVVCWGPWSNSSTFELPFSTVLPSCVQSSCECGSYLDSQSLCSGSGNICK : 348  
Jingdou : LTTNNLKVVCWGPWSNSSTFELPFSTVLPSCVQSSCECGSYLDSQSLCSGSGNICK : 348

Hong\_Yundou : PMTCKLQTTAPPPPSLSPPPPSMSPPPPPPPPSSSRSKTLTNGLLAFIIGSVGAF : 406  
Jingdou : PMTCKLQTTAPPPPSLSPPPPSMSPPPPPPPPSSSRSKTLTNGLLAFIIGSVGAF : 406

Hong\_Yundou : GICTIVYCLWSGVCFGKKKVHSSVQPTITRGSSGNGGGASNNNSISSMIMRQTS : 464  
Jingdou : GICTIVYCLWSGVCFGKKKVHSSVQPTITRGSSGNGGGASNNNSISSMIMRQTS : 464

Hong\_Yundou : IMRRQRSGTSSTKHPDRAEFTLAELVAATNNFLENKIGAGSFGVVYKGLADGREV : 522  
Jingdou : IMRRQRSGTSSTKHPDRAEFTLAELVAATNNFLENKIGAGSFGVVYKGLADGREV : 522

Hong\_Yundou : AIKRGETGSKMKKFQEKESAFESELAFLSRLHHKHLVGLVGFCEEKDERLLVY EYMK : 580  
Jingdou : AIKRGETGSKMKKFQEKESAFESELAFLSRLHHKHLVGLVGFCEEKDERLLVY EYMK : 580

Hong\_Yundou : GALYDHLHDKNNVEKGS SVLNWKMRIKIALDAARGIEYLHNYAVPSIIHRDIKSSNI : 638  
Jingdou : GALYDHLHDKNNVEKGS SVLNWKMRIKIALDAARGIEYLHNYAVPSIIHRDIKSSNI : 638

Hong\_Yundou : LIDVTWTVARVSDFGLSLMSPEPDRDYRPMKAVGT VGYIDPEYYGLNVLTAKSDVYGLG : 696  
Jingdou : LIDVTWTVARVSDFGLSLMSPEPDRDYRPMKAVGT VGYIDPEYYGLNVLTAKSDVYGLG : 696

Hong\_Yundou : VVLELLTGKRAIFKYGEDGGTPLSLVDFAVPRILAGEMVKILDPRVGPDEKEAEAV : 754  
Jingdou : VVLELLTGKRAIFKYGEDGGTPLSLVDFAVPRILAGEMVKILDPRVGPDEKEAEAV : 754

Hong\_Yundou : ELVAYTAIYCVNLEGKDRPTMADIVVNLERALGICSSHDSISSGSI SVVSE : 806  
Jingdou : ELVAYTAIYCVNLEGKDRPTMADIVVNLERALGICSSHDSISSGSI SVVSE : 806
