# Supplementary material for: Mapping and Genetic Structure Analysis of the Anthracnose Resistance Locus Co-1HY in the Common Bean (Phaseolus vulgaris L.)
Source: PubMed Central journal article supplement (PMC5226810; doi:10.1371/journal.pone.0169954), 2017-01-11
Supplement: pone.0169954.s005.pdf [file pone.0169954.s005.pdf]

a 1 : ATGGCGAATTCAGGAGCATCCCTTGTCATAGTTTTGCTTCGATAGTGGAAATATGCTATTAGAAGTAT  
b 1 : ATGGCGAATTCAGGAGCATCCCTTGTCATAGTTTTGCTTCGATAGTGGAAATATGCTATTAGAAGTAT  
c 1 : ATGGCGAATTCAGGAGCATCCCTTGTCATAGTTTTGCTTCGATAGTGGAAATATGCTATTAGAAGTAT  
d 1 : ATGGCGAATTCAGGAGCATCCCTTGTCATAGTTTTGCTTCGATAGTGGAAATATGCTATTAGAAGTAT  
e 1 : ATGGCGAATTCAGGAGCATCCCTTGTCATAGTTTTGCTTCGATAGTGGAAATATGCTATTAGAAGTAT  
f 1 : ATGGCGAATTCAGGAGCATCCCTTGTCATAGTTTTGCTTCGATAGTGGAAATATGCTATTAGAAGTAT  
g 1 : ATGGCGAATTCAGGAGCATCCCTTGTCATAGTTTTGCTTCGATAGTGGAAATATGCTATTAGAAGTAT

a 69 : TGGAGGAGATTTGGGGGCATTTCCCTTGCGTGATTTTTCTTTTCGCAGTGGAGAATGCGTGGAGTAGTA  
b 69 : TGGAGGAGATTTGGGGGCATTTCCCTTGCGTGATTTTTCTTTTCGCAGTGGAGAATGCGTGGAGTAGTA  
c 69 : TGGAGGAGATTTGGGGGCATTTCCCTTGCGTGATTTTTCTTTTCGCAGTGGAGAATGCGTGGAGTAGTA  
d 69 : TGGAGGAGATTTGGGGGCATTTCCCTTGCGTGATTTTTCTTTTCGCAGTGGAGAATGCGTGGAGTAGTA  
e 69 : TGGAGGAGATTTGGGGGCATTTCCCTTGCGTGATTTTTCTTTTCGCAGTGGAGAATGCGTGGAGTAGTA  
f 69 : TGGAGGAGATTTGGGGGCATTTCCCTTGCGTGATTTTTCTTTTCGCAGTGGAGAATGCGTGGAGTAGTA  
g 69 : TGGAGGAGATTTGGGGGCATTTCCCTTGCGTGATTTTTCTTTTCGCAGTGGAGAATGCGTGGAGTAGTA

a 137 : TTGGAGGAGATTTGGGAGCAGTACCTGTTTCGTGGTTTTGCTTCTATAGTGGAGAATATGATGAGAAGT  
b 137 : TTGGAGGAGATTTGGGAGCAGTACCTGTTTCGTGGTTTTGCTTCTATAGTGGAGAATATGATGAGAAGT  
c 137 : TTGGAGGAGATTTGGGAGCAGTACCTGTTTCGTGGTTTTGCTTCTATAGTGGAGAATATGATGAGAAGT  
d 137 : TTGGAGGAGATTTGGGAGCAGTACCTGTTTCGTGGTTTTGCTTCTATAGTGGAGAATATGATGAGAAGT  
e 137 : TTGGAGGAGATTTGGGAGCAGTACCTGTTTCGTGGTTTTGCTTCTATAGTGGAGAATATGATGAGAAGT  
f 137 : TTGGAGGAGATTTGGGAGCAGTACCTGTTTCGTGGTTTTGCTTCTATAGTGGAGAATATGATGAGAAGT  
g 137 : TTGGAGGAGATTTGGGAGCAGTACCTGTTTCGTGGTTTTGCTTCTATAGTGGAGAATATGATGAGAAGT

a 205 : GTTGGAGGAGATTTGAGAGCATTACCCGTGCATGGTTTTGCTTCGGCAGTGGAGAATGCAATGATAAG  
b 205 : GTTGGAGGAGATTTGAGAGCATTACCCGTGCATGGTTTTGCTTCGGCAGTGGAGAATGCAATGATAAG  
c 205 : GTTGGAGGAGATTTGAGAGCATTACCCGTGCATGGTTTTGCTTCGGCAGTGGAGAATGCAATGATAAG  
d 205 : GTTGGAGGAGATTTGAGAGCATTACCCGTGCATGGTTTTGCTTCGGCAGTGGAGAATGCAATGATAAG  
e 205 : GTTGGAGGAGATTTGAGAGCATTACCCGTGCATGGTTTTGCTTCGGCAGTGGAGAATGCAATGATAAG  
f 205 : GTTGGAGGAGATTTGAGAGCATTACCCGTGCATGGTTTTGCTTCGGCAGTGGAGAATGCAATGATAAG  
g 205 : GTTGGAGGAGATTTGAGAGCATTACCCGTGCATGGTTTTGCTTCGGCAGTGGAGAATGCAATGATAAG

a 273 : TATTGGAGGAGATTTGGGAGTATCACCCATGCAGGGTTTTGCTTCGAGAGTGGAGAATGCTATGAGTA  
b 273 : TATTGGAGGAGATTTGGGAGTATCACCCATGCAGGGTTTTGCTTCGAGAGTGGAGAATGCTATGAGTA  
c 273 : TATTGGAGGAGATTTGGGAGTATCACCCATGCAGGGTTTTGCTTCGAGAGTGGAGAATGCTATGAGTA  
d 273 : TATTGGAGGAGATTTGGGAGTATCACCCATGCAGGGTTTTGCTTCGAGAGTGGAGAATGCTATGAGTA  
e 273 : TATTGGAGGAGATTTGGGAGTATCACCCATGCAGGGTTTTGCTTCGAGAGTGGAGAATGCTATGAGTA  
f 273 : TATTGGAGGAGATTTGGGAGTATCACCCATGCAGGGTTTTGCTTCGAGAGTGGAGAATGCTATGAGTA  
g 273 : TATTGGAGGAGATTTGGGAGTATCACCCATGCAGGGTTTTGCTTCGAGAGTGGAGAATGCTATGAGTA

a 341 : GCATTGGTGGAGATTTGGGAATCATCCCATCCCCTGTGCAATGGTTTTCAAGTATTCACCTTACTTGAG  
b 341 : GCATTGGTGGAGATTTGGGAATCATCCCATCCCCTGTGCAATGGTTTTCAAGTATTCACCTTACTTGAG  
c 341 : GCATTGGTGGAGATTTGGGAATCATCCCATCCCCTGTGCAATGGTTTTCAAGTATTCACCTTACTTGAG  
d 341 : GCATTGGTGGAGATTTGGGAATCATCCCATCCCCTGTGCAATGGTTTTCAAGTATTCACCTTACTTGAG  
e 341 : GCATTGGTGGAGATTTGGGAATCATCCCATCCCCTGTGCAATGGTTTTCAAGTATTCACCTTACTTGAG  
f 341 : GCATTGGTGGAGATTTGGGAATCATCCCATCCCCTGTGCAATGGTTTTCAAGTATTCACCTTACTTGAG  
g 341 : GCATTGGTGGAGATTTGGGAATCATCCCATCCCCTGTGCAATGGTTTTCAAGTATTCACCTTACTTGAG

a 409 : CTTGCAGCAGCCACCAACAATTTCTCAGTTGACAACAAGATTCGCGCTGGAAGCTCTAGTGTGTGTA  
b 409 : CTTGCAGCAGCCACCAACAATTTCTCAGTTGACAACAAGATTCGCGCTGGAAGCTCTAGTGTGTGTA  
c 409 : CTTGCAGCAGCCACCAACAATTTCTCAGTTGACAACAAGATTCGCGCTGGAAGCTCTAGTGTGTGTA  
d 409 : CTTGCAGCAGCCACCAACAATTTCTCAGTTGACAACAAGATTCGCGCTGGAAGCTCTAGTGTGTGTA  
e 409 : CTTGCAGCAGCCACCAACAATTTCTCAGTTGACAACAAGATTCGCGCTGGAAGCTCTAGTGTGTGTA  
f 409 : CTTGCAGCAGCCACCAACAATTTCTCAGTTGACAACAAGATTCGCGCTGGAAGCTCTAGTGTGTGTA  
g 409 : CTTGCAGCAGCCACCAACAATTTCTCAGTTGACAACAAGATTCGCGCTGGAAGCTCTAGTGTGTGTA

a 477 : CAGGGGAAAAC TCGTTGATGGTAGTGAGGTTACAATAGAAAGAGTAGAAAGGTGGAGCAGTAGAACGG  
b 477 : CAGGGGAAAAC TCGTTGATGGTAGTGAGGTTACAATAGAAAGAGTAGAAAGGTGGAGCAGTAGAACGG  
c 477 : CAGGGGAAAAC TCGTTGATGGTAGTGAGGTTACAATAGAAAGAGTAGAAAGGTGGAGCAGTAGAACGG  
d 477 : CAGGGGAAAAC TCGTTGATGGTAGTGAGGTTACAATAGAAAGAGTAGAAAGGTGGAGCAGTAGAACGG  
e 477 : CAGGGGAAAAC TCGTTGATGGTAGTGAGGTTACAATAGAAAGAGTAGAAAGGTGGAGCAGTAGAACGG  
f 477 : CAGGGGAAAAC TCGTTGATGGTAGTGAGGTTACAATAGAAAGAGTAGAAAGGTGGAGCAGTAGAACGG  
g 477 : CAGGGGAAAAC TCGTTGATGGTAGTGAGGTTACAATAGAAAGAGTAGAAAGGTGGAGCAGTAGAACGG

a 545 : TGAAGAGGCC TCTGGTGGAGGAGAACGCTAGTTTGAACATTTTGCCTGGTTTACGTCCCAAGAAC  
b 545 : TGAAGAGGCC TCTGGTGGAGGAGAACGCTAGTTTGAACATTTTGCCTGGTTTACGTCCCAAGAAC  
c 545 : TGAAGAGGCC TCTGGTGGAGGAGAACGCTAGTTTGAACATTTTGCCTGGTTTACGTCCCAAGAAC  
d 545 : TGAAGAGGCC TCTGGTGGAGGAGAACGCTAGTTTGAACATTTTGCCTGGTTTACGTCCCAAGAAC  
e 545 : TGAAGAGGCC TCTGGTGGAGGAGAACGCTAGTTTGAACATTTTGCCTGGTTTACGTCCCAAGAAC  
f 545 : TGAAGAGGCC TCTGGTGGAGGAGAACGCTAGTTTGAACATTTTGCCTGGTTTACGTCCCAAGAAC  
g 545 : TGAAGAGGCC TCTGGTGGAGGAGAACGCTAGTTTGAACATTTTGCCTGGTTTACGTCCCAAGAAC

a 613 : TTGGTTGGGCTGGTTGGGTTGTGTGAGGAGAAAAATGAAAGGGTGTGGTGTATGAGGGCATGAAGAA  
b 613 : TTGGTTGGGCTGGTTGGGTTGTGTGAGGAGAAAAATGAAAGGGTGTGGTGTATGAGGGCATGAAGAA  
c 613 : TTGGTTGGGCTGGTTGGGTTGTGTGAGGAGAAAAATGAAAGGGTGTGGTGTATGAGGGCATGAAGAA  
d 613 : TTGGTTGGGCTGGTTGGGTTGTGTGAGGAGAAAAATGAAAGGGTGTGGTGTATGAGGGCATGAAGAA  
e 613 : TTGGTTGGGCTGGTTGGGTTGTGTGAGGAGAAAAATGAAAGGGTGTGGTGTATGAGGGCATGAAGAA  
f 613 : TTGGTTGGGCTGGTTGGGTTGTGTGAGGAGAAAAATGAAAGGGTGTGGTGTATGAGGGCATGAAGAA  
g 613 : TTGGTTGGGCTGGTTGGGTTGTGTGAGGAGAAAAATGAAAGGGTGTGGTGTATGAGGGCATGAAGAA

a 681 : TGGGTCATTGTATGATCATTACATGAGAAGGGTAGCAGTGTGTTGAATTCGTGGAAAATGAGGATAA  
b 681 : TGGGTCATTGTATGATCATTACATGAGAAGGGTAGCAGTGTGTTGAATTCGTGGAAAATGAGGATAA  
c 681 : TGGGTCATTGTATGATCATTACATGAGAAGGGTAGCAGTGTGTTGAATTCGTGGAAAATGAGGATAA  
d 681 : TGGGTCATTGTATGATCATTACATGAGAAGGGTAGCAGTGTGTTGAATTCGTGGAAAATGAGGATAA  
e 681 : TGGGTCATTGTATGATCATTACATGAGAAGGGTAGCAGTGTGTTGAATTCGTGGAAAATGAGGATAA  
f 681 : TGGGTCATTGTATGATCATTACATGAGAAGGGTAGCAGTGTGTTGAATTCGTGGAAAATGAGGATAA  
g 681 : TGGGTCATTGTATGATCATTACATGAGAAGGGTAGCAGTGTGTTGAATTCGTGGAAAATGAGGATAA

a 749 : AAATTGCTTTGGATGCTTCCGAGGAATAGAATATCTGCATAAGTTGGAGTTCATCTCCTGTTCAT  
b 749 : AAATTGCTTTGGATGCTTCCGAGGAATAGAATATCTGCATAAGTTGGAGTTCATCTCCTGTTCAT  
c 749 : AAATTGCTTTGGATGCTTCCGAGGAATAGAATATCTGCATAAGTTGGAGTTCATCTCCTGTTCAT  
d 749 : AAATTGCTTTGGATGCTTCCGAGGAATAGAATATCTGCATAAGTTGGAGTTCATCTCCTGTTCAT  
e 749 : AAATTGCTTTGGATGCTTCCGAGGAATAGAATATCTGCATAAGTTGGAGTTCATCTCCTGTTCAT  
f 749 : AAATTGCTTTGGATGCTTCCGAGGAATAGAATATCTGCATAAGTTGGAGTTCATCTCCTGTTCAT  
g 749 : AAATTGCTTTGGATGCTTCCGAGGAATAGAATATCTGCATAAGTTGGAGTTCATCTCCTGTTCAT

a 817 : GGAGATATCAACCCTTCCAACATTCTTCTTGATGCTACTTGGACAGCAAAGGTATCTAACATTGGGAA  
b 817 : GGAGATATCAACCCTTCCAACATTCTTCTTGATGCTACTTGGACAGCAAAGGTATCTAACATTGGGAA  
c 817 : GGAGATATCAACCCTTCCAACATTCTTCTTGATGCTACTTGGACAGCAAAGGTATCTAACATTGGGAA  
d 817 : GGAGATATCAACCCTTCCAACATTCTTCTTGATGCTACTTGGACAGCAAAGGTATCTAACATTGGGAA  
e 817 : GGAGATATCAACCCTTCCAACATTCTTCTTGATGCTACTTGGACAGCAAAGGTATCTAACATTGGGAA  
f 817 : GGAGATATCAACCCTTCCAACATTCTTCTTGATGCTACTTGGACAGCAAAGGTATCTAACATTGGGAA  
g 817 : GGAGATATCAACCCTTCCAACATTCTTCTTGATGCTACTTGGACAGCAAAGGTATCTAACATTGGGAA

a 885 : GGCAGCAGGAACGTTTGGATACATTGATCCTGAGTACATTGATCTGAATGTGTTGACAACAAAGAGTG  
b 885 : GGCAGCAGGAACGTTTGGATACATTGATCCTGAGTACATTGATCTGAATGTGTTGACAACAAAGAGTG  
c 885 : GGCAGCAGGAACGTTTGGATACATTGATCCTGAGTACATTGATCTGAATGTGTTGACAACAAAGAGTG  
d 885 : GGCAGCAGGAACGTTTGGATACATTGATCCTGAGTACATTGATCTGAATGTGTTGACAACAAAGAGTG  
e 885 : GGCAGCAGGAACGTTTGGATACATTGATCCTGAGTACATTGATCTGAATGTGTTGACAACAAAGAGTG  
f 885 : GGCAGCAGGAACGTTTGGATACATTGATCCTGAGTACATTGATCTGAATGTGTTGACAACAAAGAGTG  
g 885 : GGCAGCAGGAACGTTTGGATACATTGATCCTGAGTACATTGATCTGAATGTGTTGACAACAAAGAGTG

a 953 : ATGTGTATGGATTGGAGTTGTACTGCTTGAACTTTTAACAGGAAAAAATGGAGGCACCATATTACAT  
b 953 : ATGTGTATGGATTGGAGTTGTACTGCTTGAACTTTTAACAGGAAAAAATGGAGGCACCATATTACAT  
c 953 : ATGTGTATGGATTGGAGTTGTACTGCTTGAACTTTTAACAGGAAAAAATGGAGGCACCATATTACAT  
d 953 : ATGTGTATGGATTGGAGTTGTACTGCTTGAACTTTTAACAGGAAAAAATGGAGGCACCATATTACAT  
e 953 : ATGTGTATGGATTGGAGTTGTACTGCTTGAACTTTTAACAGGAAAAAATGGAGGCACCATATTACAT  
f 953 : ATGTGTATGGATTGGAGTTGTACTGCTTGAACTTTTAACAGGAAAAAATGGAGGCACCATATTACAT  
g 953 : ATGTGTATGGATTGGAGTTGTACTGCTTGAACTTTTAACAGGAAAAAATGGAGGCACCATATTACAT

a 1021 : GTACCCTCTGCAGAGGTTAGTATTTTGGGTGGAGATTTTGTGAAAAATTTGGATAAAAAGGGTTGGAGA  
b 1021 : GTACCCTCTGCAGAGGTTAGTATTTTGGGTGGAGATTTTGTGAAAAATTTGGATAAAAAGGGTTGGAGA  
c 1021 : GTACCCTCTGCAGAGGTTAGTATTTTGGGTGGAGATTTTGTGAAAAATTTGGATAAAAAGGGTTGGAGA  
d 1021 : GTACCCTCTGCAGAGGTTAGTATTTTGGGTGGAGATTTTGTGAAAAATTTGGATAAAAAGGGTTGGAGA  
e 1021 : GTACCCTCTGCAGAGGTTAGTATTTTGGGTGGAGATTTTGTGAAAAATTTGGATAAAAAGGGTTGGAGA  
f 1021 : GTACCCTCTGCAGAGGTTAGTATTTTGGGTGGAGATTTTGTGAAAAATTTGGATAAAAAGGGTTGGAGA  
g 1021 : GTACCCTCTGCAGAGGTTAGTATTTTGGGTGGAGATTTTGTGAAAAATTTGGATAAAAAGGGTTGGAGA

a 1089 : ACCCCGTCTCAATGAAGCCAAGGCACTGAAGTTAGTGGCCCTACTGCCATCAATTGTGTAATGTGG  
b 1089 : ACCCCGTCTCAATGAAGCCAAGGCACTGAAGTTAGTGGCCCTACTGCCATCAATTGTGTAATGTGG  
c 1089 : ACCCCGTCTCAATGAAGCCAAGGCACTGAAGTTAGTGGCCCTACTGCCATCAATTGTGTAATGTGG  
d 1089 : ACCCCGTCTCAATGAAGCCAAGGCACTGAAGTTAGTGGCCCTACTGCCATCAATTGTGTAATGTGG  
e 1089 : ACCCCGTCTCAATGAAGCCAAGGCACTGAAGTTAGTGGCCCTACTGCCATCAATTGTGTAATGTGG  
f 1089 : ACCCCGTCTCAATGAAGCCAAGGCACTGAAGTTAGTGGCCCTACTGCCATCAATTGTGTAATGTGG  
g 1089 : ACCCCGTCTCAATGAAGCCAAGGCACTGAAGTTAGTGGCCCTACTGCCATCAATTGTGTAATGTGG

a 1157 : AAGGAAAGGTTAGACCAACCAGTGCTCAGGTTGTGTTCAATTTGGAGAGGGCTTTTGCTTATTTCCGG  
b 1157 : AAGGAAAGGTTAGACCAACCAGTGCTCAGGTTGTGTTCAATTTGGAGAGGGCTTTTGCTTATTTCCGG  
c 1157 : AAGGAAAGGTTAGACCAACCAGTGCTCAGGTTGTGTTCAATTTGGAGAGGGCTTTTGCTTATTTCCGG  
d 1157 : AAGGAAAGGTTAGACCAACCAGTGCTCAGGTTGTGTTCAATTTGGAGAGGGCTTTTGCTTATTTCCGG  
e 1157 : AAGGAAAGGTTAGACCAACCAGTGCTCAGGTTGTGTTCAATTTGGAGAGGGCTTTTGCTTATTTCCGG  
f 1157 : AAGGAAAGGTTAGACCAACCAGTGCTCAGGTTGTGTTCAATTTGGAGAGGGCTTTTGCTTATTTCCGG  
g 1157 : AAGGAAAGGTTAGACCAACCAGTGCTCAGGTTGTGTTCAATTTGGAGAGGGCTTTTGCTTATTTCCGG

a 1225 : CGGCGGTACTAG  
b 1225 : CGG---TACTAG  
c 1225 : CGG---TACTAG  
d 1225 : CGG---TACTAG  
e 1225 : CGG---TACTAG  
f 1225 : ---TACTAG  
g 1225 : ---TACTAG
